# Supplementary material for: TMG-123, a novel glucokinase activator, exerts durable effects on hyperglycemia without increasing triglyceride in diabetic animal models
Source: PLOS journal article supplement (doi:10.1371/journal.pone.0172252), 2017-02-16
Supplement: S3 (10.1371/journal.pone.0172252.s003) [file journal.pone.0172252.s003]

**Figure S3. TMG-123 did not affect the amount of food intake.**

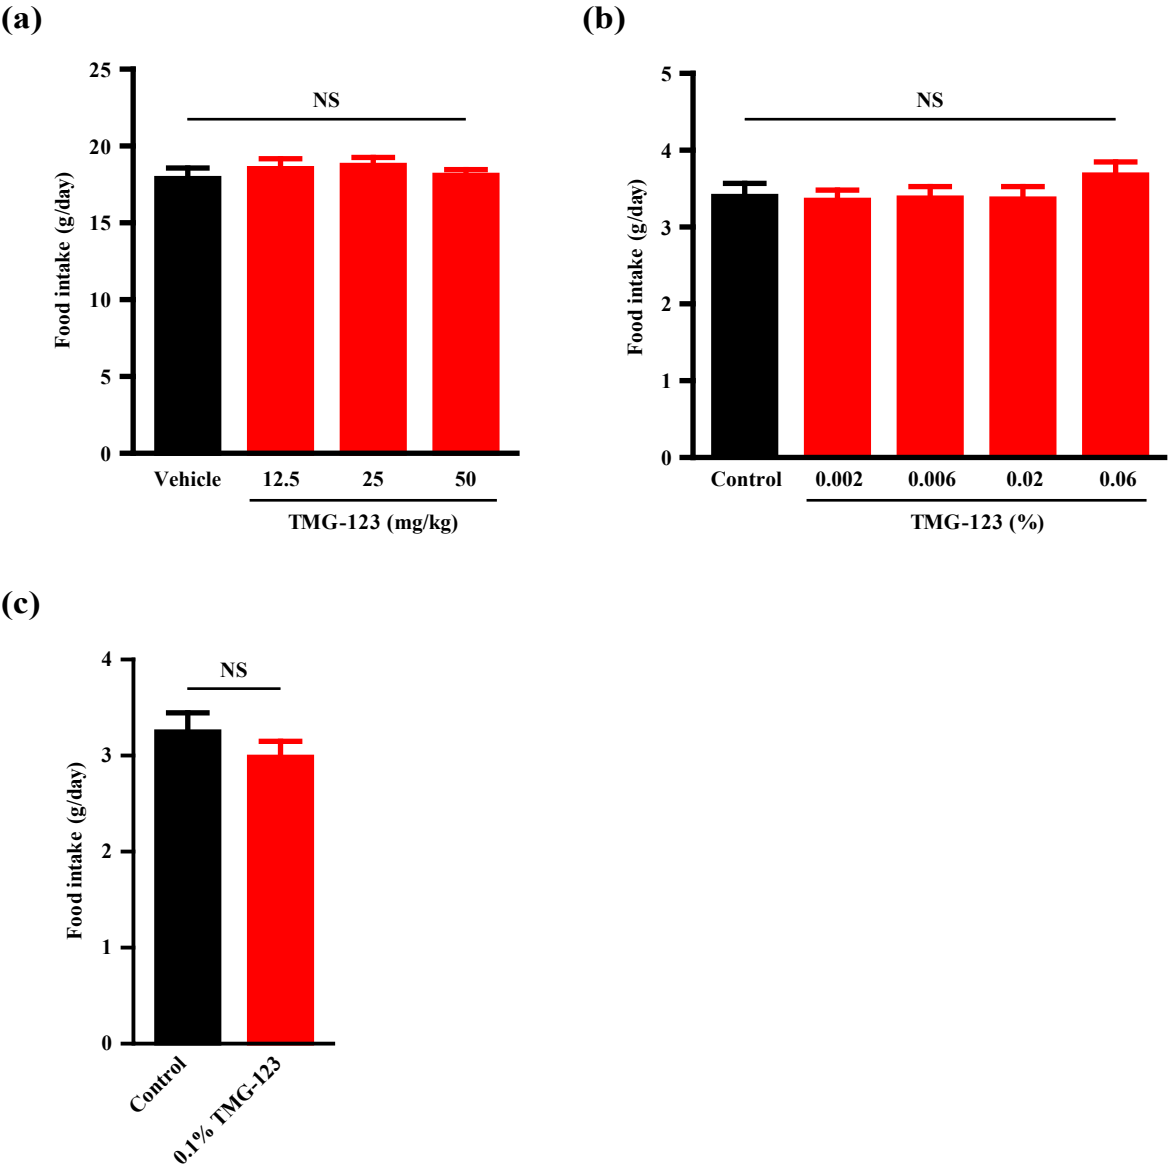

The average of daily food intake levels in (a) 4-week study in Goto-Kakizaki rats (n=9-10) and (b) 4-week study in DIO mice (n=10). (c) Daily food intake levels at 23 week in 24-week study in DIO mice (n=8). NS = not significant.
